# Supplementary material for: A Genome-Wide mQTL Analysis in Human Adipose Tissue Identifies Genetic Variants Associated with DNA Methylation, Gene Expression and Metabolic Traits
Source: PLoS One. 2016 Jun 20;11(6):e0157776. doi: 10.1371/journal.pone.0157776 (PMC4913906; doi:10.1371/journal.pone.0157776)
Supplement: S5 Table — SNPs that are found directly in the catalog are marked with grey, and ones that are found to be in LD with GWAS catalog SNPs with white. LD proxy analysis performed using SNAP (1000 Genomes project, CEU population panel, r2 > 0.8, distance limit 500kb) [86]. (XLSX) [file pone.0157776.s005.xlsx]

## Sheet: trans mQTL - GWAS Catalog
Reported Disease SNP	Reported Gene(s)	Disease Trait(s)	mQTL-SNP (proxy-SNP)	Distance between Reported Disease SNP and mQTL-SNP	R2 between reported disease SNP and mQTL-SNP	D' between reported disease SNP and mQTL SNP	GWAS Catalog Data	SNPs	Date Added to Catalog	PUBMEDID	First.Author	Date	Journal	Link	Study	Disease/Trait	Initial Sample Size	Replication Sample Size	Region	Chr_id	Chr_pos	Reported Gene(s)	Mapped_gene	Upstream_gene_id	Downstream_gene_id	Snp_gene_ids	Upstream_gene_distance	Downstream_gene_distance	Strongest SNP Risk Allele	Merged	Snp_id_current	Context	Intergenic	Risk Allele Frequency	P-Value	Pvalue_mlog	P-Value_text	OR or Beta	95% CI_text.	Platform SNPs passing QC	CNV	Annotation Proxy SNP	Proxy-SNP	Chromosome	Coordinate_HG18	GeneVariant	GeneName	GeneDescription
rs1555543	PTBP2	Body mass index	rs10489741	2391	1	1		rs1555543	11/17/2010	20935630	Speliotes EK	10/10/2010	Nat Genet	http://www.ncbi.nlm.nih.gov/pubmed/20935630	Association analyses of 249,796 individuals reveal 18 new loci associated with body mass index.	Body mass index	Up to 123,865 European ancestry individuals	Up to 125,931 European ancestry individuals	1p21	1	96944797	PTBP2	EEF1A1P11 - NDUFS5P2	440595	100286918		30.62	105.17	rs1555543-C	0	1555543	Intergenic	1	0.59	4e-10	9.39794		0.06	[0.02-0.10] kg/m2 increase	Affymetrix, Illumina and Perlegen [~2.8 million] (imputed)	N		rs10489741	chr1	96714994	INTERGENIC	N/A	N/A
rs1816752	PARP4	Obesity-related traits	rs1050112	28348	0.905	1		rs1816752	04/09/2013	23251661	Comuzzie AG	12/04/2012	PLoS One	http://www.ncbi.nlm.nih.gov/pubmed/23251661	Novel genetic loci identified for the pathophysiology of childhood obesity in the Hispanic population.	Obesity-related traits	815 related Hispanic ancestry children from 263 families	NR	13q12.1	13	24980949	PARP4	CYCSP33 - PARP4	221180	143		5.78	14.12	rs1816752-G	0	1816752	Intergenic	1	0.332	2e-06	5.69897	(Urinary free norepinephrine )	0.05	[NR] nmol/d increase	Illumina [899,892]	N		rs1050112	chr13	23907297	NON_SYNONYMOUS_CODING	PARP4	Poly [ADP-ribose] polymerase 4 (EC 2.4.2.30) (PARP-4) (Vault poly(ADP- ribose) polymerase) (VPARP) (193 kDa vault protein) (PARP- related/IalphaI-related H5/proline-rich) (PH5P). [Source:Uniprot/SWISSPROT;Acc:Q9UKK3]
rs1816752	PARP4	Obesity-related traits	rs1816752	0	1	1		rs1816752	04/09/2013	23251661	Comuzzie AG	12/04/2012	PLoS One	http://www.ncbi.nlm.nih.gov/pubmed/23251661	Novel genetic loci identified for the pathophysiology of childhood obesity in the Hispanic population.	Obesity-related traits	815 related Hispanic ancestry children from 263 families	NR	13q12.1	13	24980949	PARP4	CYCSP33 - PARP4	221180	143		5.78	14.12	rs1816752-G	0	1816752	Intergenic	1	0.332	2e-06	5.69897	(Urinary free norepinephrine )	0.05	[NR] nmol/d increase	Illumina [899,892]	N		rs1816752	chr13	23878949	INTERGENIC	N/A	N/A
rs1816752	PARP4	Obesity-related traits	rs4770676	22934	0.935	1		rs1816752	04/09/2013	23251661	Comuzzie AG	12/04/2012	PLoS One	http://www.ncbi.nlm.nih.gov/pubmed/23251661	Novel genetic loci identified for the pathophysiology of childhood obesity in the Hispanic population.	Obesity-related traits	815 related Hispanic ancestry children from 263 families	NR	13q12.1	13	24980949	PARP4	CYCSP33 - PARP4	221180	143		5.78	14.12	rs1816752-G	0	1816752	Intergenic	1	0.332	2e-06	5.69897	(Urinary free norepinephrine )	0.05	[NR] nmol/d increase	Illumina [899,892]	N		rs4770676	chr13	23901883	INTRONIC	PARP4	Poly [ADP-ribose] polymerase 4 (EC 2.4.2.30) (PARP-4) (Vault poly(ADP- ribose) polymerase) (VPARP) (193 kDa vault protein) (PARP- related/IalphaI-related H5/proline-rich) (PH5P). [Source:Uniprot/SWISSPROT;Acc:Q9UKK3]
