# Supplementary material for: A Genome-Wide mQTL Analysis in Human Adipose Tissue Identifies Genetic Variants Associated with DNA Methylation, Gene Expression and Metabolic Traits
Source: PLoS One. 2016 Jun 20;11(6):e0157776. doi: 10.1371/journal.pone.0157776 (PMC4913906; doi:10.1371/journal.pone.0157776)
Supplement: S7 Table — Sheet a: Identified trans SNP-mRNA transcript pairs, including statistical results of associations and gene assignment for mRNA transcripts. Sheet b: Additional annotation data for SNPs present in sheet a. Sheet c: Additional annotation data for probesets present in sheet a. Annotations are based on NetAffx transcript cluster data for HuGene-1_0-st array (Affymetrix). (XLSX) [file pone.0157776.s007.xlsx]

## Sheet: a) eQTL trans-mQTL-SNPs
SNP	mRNA.Probeset.ID	SNP_Minor.Allele	SNP_Major.Allele	T-Stat SNPvsCpG	Corrected.P.Value.SNP.vs.mRNA	Gene.Assignment.mRNA.Probeset	Minor Allele Frequency
rs199533	8007848	A	G	11.9011	5.01893e-14	LOC644172	0.1681
rs1881194	8007848	A	G	11.7216	1.29278e-13	LOC644172	0.1737
rs418891	8007848	A	C	11.7187	1.31269e-13	LOC644172	0.1681
rs2469933	8007848	A	G	11.7187	1.31269e-13	LOC644172	0.1681
rs12185233	8007848	G	C	11.6182	2.23056e-13	LOC644172	0.1709
rs2532316	8007848	A	G	11.3812	7.81042e-13	LOC644172	0.1709
rs17585974	8007848	C	A	11.361	8.69049e-13	LOC644172	0.1624
rs17334797	8007848	G	A	11.3609	8.69399e-13	LOC644172	0.1723
rs17426064	8007848	A	G	11.3609	8.69399e-13	LOC644172	0.1723
rs1396862	8007848	A	G	11.3609	8.69399e-13	LOC644172	0.1723
rs16940665	8007848	G	A	11.3609	8.69399e-13	LOC644172	0.1723
rs17763596	8007848	A	C	11.3609	8.69399e-13	LOC644172	0.1723
rs12185268	8007848	G	A	11.3609	8.69399e-13	LOC644172	0.1723
rs12185235	8007848	A	G	11.3609	8.69399e-13	LOC644172	0.1723
rs12373123	8007848	G	A	11.3609	8.69399e-13	LOC644172	0.1723
rs12373142	8007848	C	G	11.3609	8.69399e-13	LOC644172	0.1723
rs17691610	8007848	A	C	11.3609	8.69399e-13	LOC644172	0.1723
rs17650901	8007848	G	A	11.3609	8.69399e-13	LOC644172	0.1723
rs17651549	8007848	A	G	11.3609	8.69399e-13	LOC644172	0.1723
rs1052551	8007848	A	G	11.3609	8.69399e-13	LOC644172	0.1723
rs17652121	8007848	G	A	11.3609	8.69399e-13	LOC644172	0.1723
rs1052587	8007848	G	A	11.3609	8.69399e-13	LOC644172	0.1723
rs7350928	8007848	A	G	11.3609	8.69399e-13	LOC644172	0.1723
rs17574361	8007848	G	A	11.3609	8.69399e-13	LOC644172	0.1723
rs17574604	8007848	G	A	11.3609	8.69399e-13	LOC644172	0.1723
rs17660464	8007848	A	C	11.3609	8.69399e-13	LOC644172	0.1723
rs17577094	8007848	G	A	11.3609	8.69399e-13	LOC644172	0.1723
rs1052553	8007848	G	A	11.3297	1.02543e-12	LOC644172	0.1737
rs1881194	8016261	A	G	11.2579	1.49999e-12	LOC644172	0.1737
rs12185233	8016261	G	C	11.1875	2.17751e-12	LOC644172	0.1709
rs418891	8016261	A	C	11.1623	2.4891e-12	LOC644172	0.1681
rs2469933	8016261	A	G	11.1623	2.4891e-12	LOC644172	0.1681
rs199533	8016261	A	G	11.1445	2.73555e-12	LOC644172	0.1681
rs2532329	8007848	A	G	11.0896	3.65918e-12	LOC644172	0.1695
rs12185233	8016259	G	C	11.0865	3.72098e-12	LRRC37A2	0.1709
rs17660132	8007848	G	A	11.0808	3.83383e-12	LOC644172	0.1653
rs1881194	8016259	A	G	11.0504	4.5045e-12	LRRC37A2	0.1737
rs17334797	8016261	G	A	10.9946	6.05719e-12	LOC644172	0.1723
rs17426064	8016261	A	G	10.9946	6.05719e-12	LOC644172	0.1723
rs1396862	8016261	A	G	10.9946	6.05719e-12	LOC644172	0.1723
rs16940665	8016261	G	A	10.9946	6.05719e-12	LOC644172	0.1723
rs17763596	8016261	A	C	10.9946	6.05719e-12	LOC644172	0.1723
rs12185268	8016261	G	A	10.9946	6.05719e-12	LOC644172	0.1723
rs12185235	8016261	A	G	10.9946	6.05719e-12	LOC644172	0.1723
rs12373123	8016261	G	A	10.9946	6.05719e-12	LOC644172	0.1723
rs12373142	8016261	C	G	10.9946	6.05719e-12	LOC644172	0.1723
rs17691610	8016261	A	C	10.9946	6.05719e-12	LOC644172	0.1723
rs17650901	8016261	G	A	10.9946	6.05719e-12	LOC644172	0.1723
rs17651549	8016261	A	G	10.9946	6.05719e-12	LOC644172	0.1723
rs1052551	8016261	A	G	10.9946	6.05719e-12	LOC644172	0.1723
rs17652121	8016261	G	A	10.9946	6.05719e-12	LOC644172	0.1723
rs1052587	8016261	G	A	10.9946	6.05719e-12	LOC644172	0.1723
rs7350928	8016261	A	G	10.9946	6.05719e-12	LOC644172	0.1723
rs17574361	8016261	G	A	10.9946	6.05719e-12	LOC644172	0.1723
rs17574604	8016261	G	A	10.9946	6.05719e-12	LOC644172	0.1723
rs17660464	8016261	A	C	10.9946	6.05719e-12	LOC644172	0.1723
rs17577094	8016261	G	A	10.9946	6.05719e-12	LOC644172	0.1723
rs1052553	8016261	G	A	10.9766	6.66256e-12	LOC644172	0.1737
rs2532274	8007848	G	A	10.9003	9.99053e-12	LOC644172	0.1752
rs2532316	8016261	A	G	10.8833	1.09333e-11	LOC644172	0.1709
rs12373168	8007848	C	A	10.8676	1.18838e-11	LOC644172	0.1765
rs1052553	8016259	G	A	10.8655	1.20193e-11	LRRC37A2	0.1737
rs17334797	8016259	G	A	10.8289	1.45963e-11	LRRC37A2	0.1723
rs17426064	8016259	A	G	10.8289	1.45963e-11	LRRC37A2	0.1723
rs1396862	8016259	A	G	10.8289	1.45963e-11	LRRC37A2	0.1723
rs16940665	8016259	G	A	10.8289	1.45963e-11	LRRC37A2	0.1723
rs17763596	8016259	A	C	10.8289	1.45963e-11	LRRC37A2	0.1723
rs12185268	8016259	G	A	10.8289	1.45963e-11	LRRC37A2	0.1723
rs12185235	8016259	A	G	10.8289	1.45963e-11	LRRC37A2	0.1723
rs12373123	8016259	G	A	10.8289	1.45963e-11	LRRC37A2	0.1723
rs12373142	8016259	C	G	10.8289	1.45963e-11	LRRC37A2	0.1723
rs17691610	8016259	A	C	10.8289	1.45963e-11	LRRC37A2	0.1723
rs17650901	8016259	G	A	10.8289	1.45963e-11	LRRC37A2	0.1723
rs17651549	8016259	A	G	10.8289	1.45963e-11	LRRC37A2	0.1723
rs1052551	8016259	A	G	10.8289	1.45963e-11	LRRC37A2	0.1723
rs17652121	8016259	G	A	10.8289	1.45963e-11	LRRC37A2	0.1723
rs1052587	8016259	G	A	10.8289	1.45963e-11	LRRC37A2	0.1723
rs7350928	8016259	A	G	10.8289	1.45963e-11	LRRC37A2	0.1723
rs17574361	8016259	G	A	10.8289	1.45963e-11	LRRC37A2	0.1723
rs17574604	8016259	G	A	10.8289	1.45963e-11	LRRC37A2	0.1723
rs17660464	8016259	A	C	10.8289	1.45963e-11	LRRC37A2	0.1723
rs17577094	8016259	G	A	10.8289	1.45963e-11	LRRC37A2	0.1723
rs418891	8016259	A	C	10.7901	1.79317e-11	LRRC37A2	0.1681
rs2469933	8016259	A	G	10.7901	1.79317e-11	LRRC37A2	0.1681
rs17585974	8016261	C	A	10.7797	1.8953e-11	LOC644172	0.1624
rs2532316	8016259	A	G	10.6842	3.14689e-11	LRRC37A2	0.1709
rs17660132	8016261	G	A	10.6579	3.61867e-11	LOC644172	0.1653
rs415430	8007848	G	A	10.6324	4.14507e-11	LOC644172	0.1723
rs199533	8016259	A	G	10.6316	4.16231e-11	LRRC37A2	0.1681
rs2532329	8016261	A	G	10.5856	5.31323e-11	LOC644172	0.1695
rs12373168	8016261	C	A	10.4972	8.49849e-11	LOC644172	0.1765
rs12373168	8016259	C	A	10.4952	8.59041e-11	LRRC37A2	0.1765
rs199454	8007848	G	A	10.4927	8.70577e-11	LOC644172	0.1891
rs2532274	8016261	G	A	10.4059	1.38095e-10	LOC644172	0.1752
rs2532329	8016259	A	G	10.3945	1.46715e-10	LRRC37A2	0.1695
rs2532274	8016259	G	A	10.37	1.67095e-10	LRRC37A2	0.1752
rs17660132	8016259	G	A	10.3563	1.79709e-10	LRRC37A2	0.1653
rs7224296	8007848	G	A	10.3527	1.83154e-10	LOC644172	0.2059
rs17585974	8016259	C	A	10.3246	2.12748e-10	LRRC37A2	0.1624
rs17690703	8007848	A	G	10.2509	3.14731e-10	LOC644172	0.1933
rs199454	8016261	G	A	9.95433	1.52108e-09	LOC644172	0.1891
rs2732674	8007848	G	A	9.93717	1.66618e-09	LOC644172	0.1555
rs415430	8016261	G	A	9.90554	1.97094e-09	LOC644172	0.1723
rs7224296	8016261	G	A	9.89369	2.09886e-09	LOC644172	0.2059
rs17690703	8016261	A	G	9.87477	2.32067e-09	LOC644172	0.1933
rs2732674	8016261	G	A	9.8533	2.60084e-09	LOC644172	0.1555
rs199501	8007848	A	G	9.83441	2.87505e-09	LOC644172	0.1891
rs2732674	8016259	G	A	9.82005	3.10281e-09	LRRC37A2	0.1555
rs1635291	8007848	G	A	9.54884	1.30722e-08	LOC644172	0.1891
rs1724400	8007848	A	C	9.54884	1.30722e-08	LOC644172	0.1891
rs7215239	8007848	G	A	9.54884	1.30722e-08	LOC644172	0.1891
rs199454	8016259	G	A	9.38163	3.168e-08	LRRC37A2	0.1891
rs1635291	8016259	G	A	9.33274	4.10282e-08	LRRC37A2	0.1891
rs1724400	8016259	A	C	9.33274	4.10282e-08	LRRC37A2	0.1891
rs7215239	8016259	G	A	9.33274	4.10282e-08	LRRC37A2	0.1891
rs7224296	8016259	G	A	9.31328	4.54745e-08	LRRC37A2	0.2059
rs415430	8016259	G	A	9.31118	4.59812e-08	LRRC37A2	0.1723
rs199501	8016261	A	G	9.28877	5.17617e-08	LOC644172	0.1891
rs1635291	8016261	G	A	9.24716	6.44892e-08	LOC644172	0.1891
rs1724400	8016261	A	C	9.24716	6.44892e-08	LOC644172	0.1891
rs7215239	8016261	G	A	9.24716	6.44892e-08	LOC644172	0.1891
rs17690703	8016259	A	G	9.09008	1.47737e-07	LRRC37A2	0.1933
rs12185233	8007799	G	C	9.02743	2.05515e-07	MGC57346	0.1709
rs12373168	8007799	C	A	8.91421	3.72912e-07	MGC57346	0.1765
rs417968	8016259	G	A	8.88071	4.44716e-07	LRRC37A2	0.1992
rs17334797	8007799	G	A	8.86597	4.80535e-07	MGC57346	0.1723
rs17426064	8007799	A	G	8.86597	4.80535e-07	MGC57346	0.1723
rs1396862	8007799	A	G	8.86597	4.80535e-07	MGC57346	0.1723
rs16940665	8007799	G	A	8.86597	4.80535e-07	MGC57346	0.1723
rs17763596	8007799	A	C	8.86597	4.80535e-07	MGC57346	0.1723
rs12185268	8007799	G	A	8.86597	4.80535e-07	MGC57346	0.1723
rs12185235	8007799	A	G	8.86597	4.80535e-07	MGC57346	0.1723
rs12373123	8007799	G	A	8.86597	4.80535e-07	MGC57346	0.1723
rs12373142	8007799	C	G	8.86597	4.80535e-07	MGC57346	0.1723
rs17691610	8007799	A	C	8.86597	4.80535e-07	MGC57346	0.1723
rs17650901	8007799	G	A	8.86597	4.80535e-07	MGC57346	0.1723
rs17651549	8007799	A	G	8.86597	4.80535e-07	MGC57346	0.1723
rs1052551	8007799	A	G	8.86597	4.80535e-07	MGC57346	0.1723
rs17652121	8007799	G	A	8.86597	4.80535e-07	MGC57346	0.1723
rs1052587	8007799	G	A	8.86597	4.80535e-07	MGC57346	0.1723
rs7350928	8007799	A	G	8.86597	4.80535e-07	MGC57346	0.1723
rs17574361	8007799	G	A	8.86597	4.80535e-07	MGC57346	0.1723
rs17574604	8007799	G	A	8.86597	4.80535e-07	MGC57346	0.1723
rs17660464	8007799	A	C	8.86597	4.80535e-07	MGC57346	0.1723
rs17577094	8007799	G	A	8.86597	4.80535e-07	MGC57346	0.1723
rs417968	8007848	G	A	8.84776	5.28767e-07	LOC644172	0.1992
rs17660132	8007799	G	A	8.80721	6.54227e-07	MGC57346	0.1653
rs1881194	8007799	A	G	8.73396	9.60712e-07	MGC57346	0.1737
rs1052553	8007799	G	A	8.72633	9.99864e-07	MGC57346	0.1737
rs199501	8016259	A	G	8.62102	1.73545e-06	LRRC37A2	0.1891
rs2532274	8007799	G	A	8.56238	2.35788e-06	MGC57346	0.1752
rs417968	8016261	G	A	8.52495	2.86688e-06	LOC644172	0.1992
rs2532316	8007799	A	G	8.51081	3.08649e-06	MGC57346	0.1709
rs2732674	8007799	G	A	8.48152	3.596e-06	MGC57346	0.1555
rs418891	8007799	A	C	8.4257	4.81021e-06	MGC57346	0.1681
rs2469933	8007799	A	G	8.4257	4.81021e-06	MGC57346	0.1681
rs2732651	8007848	A	G	8.36625	6.55457e-06	LOC644172	0.1478
rs2532329	8007799	A	G	8.32747	8.01857e-06	MGC57346	0.1695
rs2732651	8016259	A	G	8.2932	9.58066e-06	LRRC37A2	0.1478
rs113413	8074980	G	A	-8.26455	1.11164e-05	GSTT1	0.3824
rs2732651	8016261	A	G	8.19909	1.5607e-05	LOC644172	0.1478
rs2074404	8007848	C	A	8.18435	1.68448e-05	LOC644172	0.2143
rs17690703	8007799	A	G	8.15478	1.96305e-05	MGC57346	0.1933
rs375984	8124684	A	G	8.14188	2.0985e-05	ZFP57	0.2311
rs2535238	8124684	A	C	8.14188	2.0985e-05	ZFP57	0.2311
rs2747429	8124684	G	A	8.14188	2.0985e-05	ZFP57	0.2311
rs387642	8124684	A	G	8.08668	2.79113e-05	ZFP57	0.235
rs17585974	8007799	C	A	8.04595	3.44399e-05	MGC57346	0.1624
rs2747421	8124684	G	C	8.00377	4.28024e-05	ZFP57	0.2331
rs3117289	8124684	G	A	7.99644	4.44491e-05	ZFP57	0.2017
rs3129073	8124684	G	A	7.99644	4.44491e-05	ZFP57	0.2017
rs2463524	8007848	G	A	7.97525	4.95716e-05	LOC644172	0.1447
rs2463524	8016261	G	A	7.8463	9.6127e-05	LOC644172	0.1447
rs2463524	8016259	G	A	7.81506	0.000112812	LRRC37A2	0.1447
rs3117301	8124684	A	G	7.79533	0.000124798	ZFP57	0.2395
rs2747457	8124684	C	A	7.79533	0.000124798	ZFP57	0.2395
rs2747460	8124684	A	G	7.79533	0.000124798	ZFP57	0.2395
rs2957297	8007848	A	C	7.78944	0.000128616	LOC644172	0.1435
rs199533	8007799	A	G	7.78348	0.000132596	MGC57346	0.1681
rs2074404	8016261	C	A	7.77151	0.000140968	LOC644172	0.2143
rs2739338	8074980	A	G	-7.75656	0.000152157	GSTT1	0.3941
rs3129039	8124684	A	G	7.68803	0.000215875	ZFP57	0.2185
rs6928482	8118556	G	A	-7.68211	0.00022249	HLA-DQA1	0.4202
rs2957297	8016261	A	C	7.64584	0.000267622	LOC644172	0.1435
rs2957297	8016259	A	C	7.61515	0.000312839	LRRC37A2	0.1435
rs12185233	8007803	G	C	7.60567	0.000328286	C17orf69	0.1709
rs1002286	8074980	G	A	-7.60272	0.000333256	GSTT1	0.4412
rs415430	8007799	G	A	7.58233	0.000369614	MGC57346	0.1723
rs2074404	8016259	C	A	7.56251	0.000408743	LRRC37A2	0.2143
rs17660132	8007803	G	A	7.52153	0.000503138	C17orf69	0.1653
rs1635291	8007799	G	A	7.49989	0.000561399	MGC57346	0.1891
rs1724400	8007799	A	C	7.49989	0.000561399	MGC57346	0.1891
rs7215239	8007799	G	A	7.49989	0.000561399	MGC57346	0.1891
rs17334797	8007803	G	A	7.45415	0.000707488	C17orf69	0.1723
rs17426064	8007803	A	G	7.45415	0.000707488	C17orf69	0.1723
rs1396862	8007803	A	G	7.45415	0.000707488	C17orf69	0.1723
rs16940665	8007803	G	A	7.45415	0.000707488	C17orf69	0.1723
rs17763596	8007803	A	C	7.45415	0.000707488	C17orf69	0.1723
rs12185268	8007803	G	A	7.45415	0.000707488	C17orf69	0.1723
rs12185235	8007803	A	G	7.45415	0.000707488	C17orf69	0.1723
rs12373123	8007803	G	A	7.45415	0.000707488	C17orf69	0.1723
rs12373142	8007803	C	G	7.45415	0.000707488	C17orf69	0.1723
rs17691610	8007803	A	C	7.45415	0.000707488	C17orf69	0.1723
rs17650901	8007803	G	A	7.45415	0.000707488	C17orf69	0.1723
rs17651549	8007803	A	G	7.45415	0.000707488	C17orf69	0.1723
rs1052551	8007803	A	G	7.45415	0.000707488	C17orf69	0.1723
rs17652121	8007803	G	A	7.45415	0.000707488	C17orf69	0.1723
rs1052587	8007803	G	A	7.45415	0.000707488	C17orf69	0.1723
rs7350928	8007803	A	G	7.45415	0.000707488	C17orf69	0.1723
rs17574361	8007803	G	A	7.45415	0.000707488	C17orf69	0.1723
rs17574604	8007803	G	A	7.45415	0.000707488	C17orf69	0.1723
rs17660464	8007803	A	C	7.45415	0.000707488	C17orf69	0.1723
rs17577094	8007803	G	A	7.45415	0.000707488	C17orf69	0.1723
rs17690703	8007803	A	G	7.43586	0.000775988	C17orf69	0.1933
rs4822453	8074980	C	A	-7.37262	0.00106741	GSTT1	0.416
rs12373168	8007803	C	A	7.36313	0.00111967	C17orf69	0.1765
rs29218	8124684	G	A	7.3628	0.00112148	ZFP57	0.2185
rs2000468	8074980	C	A	-7.3438	0.00123399	GSTT1	0.4454
rs29228	8124684	A	G	7.34229	0.00124342	ZFP57	0.1897
rs1007888	8074980	G	A	-7.33799	0.00127057	GSTT1	0.4449
rs1052553	8007803	G	A	7.33371	0.00129825	C17orf69	0.1737
rs1881194	8007803	A	G	7.31758	0.00140787	C17orf69	0.1737
rs3129066	8124684	G	A	7.30852	0.00147344	ZFP57	0.2437
rs3129055	8124684	G	A	7.30852	0.00147344	ZFP57	0.2437
rs9258122	8124684	A	G	7.30852	0.00147344	ZFP57	0.2437
rs1632962	8124684	A	G	7.20844	0.00243285	ZFP57	0.2227
rs2107203	8124684	A	G	7.16749	0.0029851	ZFP57	0.2479
rs2532316	8007803	A	G	7.14268	0.00337813	C17orf69	0.1709
rs2532274	8007803	G	A	7.05815	0.00514413	C17orf69	0.1752
rs418891	8007803	A	C	7.02047	0.00620104	C17orf69	0.1681
rs2469933	8007803	A	G	7.02047	0.00620104	C17orf69	0.1681
rs7224296	8007799	G	A	7.00645	0.00664701	MGC57346	0.2059
rs2532329	8007803	A	G	7.00108	0.0068263	C17orf69	0.1695
rs199501	8007799	A	G	6.9662	0.00811139	MGC57346	0.1891
rs417968	8007799	G	A	6.95578	0.00854003	MGC57346	0.1992
rs396660	8124684	A	G	6.94343	0.00907711	ZFP57	0.2899
rs445150	8124684	G	A	6.94343	0.00907711	ZFP57	0.2899
rs2747430	8124684	A	G	6.94343	0.00907711	ZFP57	0.2899
rs199454	8007799	G	A	6.89913	0.0112924	MGC57346	0.1891
rs1610601	8124684	A	C	6.88965	0.0118319	ZFP57	0.2269
rs1610621	8124684	A	G	6.88965	0.0118319	ZFP57	0.2269
rs8026605	7987526	G	A	6.85577	0.013977	C15orf57	0.395
rs6928482	8125447	G	A	-6.83053	0.0158211	HLA-DQB1	0.4202
rs7494968	7987526	A	G	6.80763	0.0177017	C15orf57	0.4034
rs6582	7987526	A	G	6.76669	0.0216289	C15orf57	0.3992
rs17585974	8007803	C	A	6.76661	0.0216376	C17orf69	0.1624
rs17631676	8007848	G	A	6.76485	0.0218244	LOC644172	0.1261
rs16970851	7987526	G	A	6.76104	0.0222352	C15orf57	0.3992
rs3751653	7987526	G	A	6.76104	0.0222352	C15orf57	0.3992
rs11858113	7987526	G	A	6.76104	0.0222352	C15orf57	0.3992
rs11855334	7987526	A	G	6.76104	0.0222352	C15orf57	0.3992
rs2412544	7987526	A	G	6.76104	0.0222352	C15orf57	0.3992
rs35047458	7987526	A	G	6.76104	0.0222352	C15orf57	0.3992
rs8041534	7987526	C	A	6.75015	0.0234503	C15orf57	0.3983
rs199533	8017688	A	G	6.70271	0.0295574	LRRC37A3	0.1681
rs6003959	8074980	A	G	-6.69791	0.0302565	GSTT1	0.2479
rs1052553	8007865	G	A	6.6853	0.0321712		0.1737
rs1052553	8007883	G	A	6.6853	0.0321712		0.1737
rs2732674	8007803	G	A	6.67538	0.0337629	C17orf69	0.1555
rs17631676	8016259	G	A	6.66285	0.035883	LRRC37A2	0.1261
rs2732651	8007799	A	G	6.65656	0.0369975	MGC57346	0.1478
rs12185233	8007865	G	C	6.65524	0.037235		0.1709
rs12185233	8007883	G	C	6.65524	0.037235		0.1709
rs1881194	8017688	A	G	6.64002	0.0400914	LRRC37A3	0.1737
rs1881194	8007865	A	G	6.63983	0.0401297		0.1737
rs1881194	8007883	A	G	6.63983	0.0401297		0.1737
rs199533	8007867	A	G	6.63518	0.0410448	LRRC37A2	0.1681
rs885945	8124684	A	G	6.60176	0.0482628	ZFP57	0.2479
rs418891	8017688	A	C	6.59603	0.0496213	LRRC37A3	0.1681
rs2469933	8017688	A	G	6.59603	0.0496213	LRRC37A3	0.1681

## Sheet: b) Annotation SNPs
SNP	CHR	MapInfo	Minor Allele	Major Allele	Minor Allele Frequency	Transcript	Gene	Mutation	Gene Locations
rs199533	17	44828931	A	G	0.1681	NR_040116,NM_006178	NSF,NSF	Silent,Synonymous_K702K	EXON
rs1881194	17	44248814	A	G	0.1737	NM_001193465,NM_001193466,NM_015443	KANSL1,KANSL1,KANSL1	Synonymous_S232S,Synonymous_S232S,Synonymous_S232S	EXON
rs418891	17	43693538	A	C	0.1681
rs2469933	17	44285531	A	G	0.1681	NM_001193465	KANSL1	Silent	INTRON
rs12185233	17	43923654	G	C	0.1709	NR_024559,NM_175882	MAPT-AS1,SPPL2C	Silent,Missense_R461P	INTRON,EXON
rs2532316	17	44213712	A	G	0.1709	NM_001193465,NM_001193466,NM_015443	KANSL1,KANSL1,KANSL1	Silent,Silent,Silent	INTRON
rs17585974	17	44249199	C	A	0.1624	NM_001193465,NM_001193466,NM_015443	KANSL1,KANSL1,KANSL1	Missense_K104T,Missense_K104T,Missense_K104T	EXON
rs17334797	17	43825912	G	A	0.1723	NM_001256299,NR_037772	CRHR1,CRHR1	Silent,Silent	INTRON
rs17426064	17	43828698	A	G	0.1723	NM_001256299,NR_037772	CRHR1,CRHR1	Silent,Silent	INTRON
rs1396862	17	43902997	A	G	0.1723	NM_001256299,NR_037772,NM_001145148,NM_001145146,NM_004382,NM_001145147	CRHR1,CRHR1,CRHR1,CRHR1,CRHR1,CRHR1	Silent,Silent,Silent,Silent,Silent,Silent	INTRON
rs16940665	17	43907896	G	A	0.1723	NM_001256299,NR_037772,NM_001145148,NM_001145146,NM_004382,NM_001145147	CRHR1,CRHR1,CRHR1,CRHR1,CRHR1,CRHR1	Synonymous_T48T,Silent,Synonymous_T223T,Synonymous_T252T,Synonymous_T223T,Synonymous_T183T	EXON
rs17763596	17	43921210	A	C	0.1723	NR_024559	MAPT-AS1	Silent	EXON
rs12185268	17	43923683	G	A	0.1723	NR_024559,NM_175882	MAPT-AS1,SPPL2C	Silent,Missense_I471V	INTRON,EXON
rs12185235	17	43923703	A	G	0.1723	NR_024559,NM_175882	MAPT-AS1,SPPL2C	Silent,Synonymous_T477T	INTRON,EXON
rs12373123	17	43924073	G	A	0.1723	NR_024559,NM_175882	MAPT-AS1,SPPL2C	Silent,Missense_S601P	INTRON,EXON
rs12373142	17	43924200	C	G	0.1723	NR_024559,NM_175882	MAPT-AS1,SPPL2C	Silent,Missense_P643R	INTRON,EXON
rs17691610	17	43970662	A	C	0.1723	NR_024559	MAPT-AS1	Silent	INTRON,EXON
rs17650901	17	44039691	G	A	0.1723	NM_001123067,NM_001203251,NM_005910,NM_016835,NM_001203252,NM_016834,NM_001123066,NM_016841	MAPT,MAPT,MAPT,MAPT,MAPT,MAPT,MAPT,MAPT	Silent,Silent,Silent,Silent,Silent,Silent,Silent,Silent	UTR,EXON
rs17651549	17	44061278	A	G	0.1723	NM_001123067,NM_001203251,NM_005910,NM_016835,NM_001203252,NM_016834,NM_001123066,NM_016841	MAPT,MAPT,MAPT,MAPT,MAPT,MAPT,MAPT,MAPT	Silent,Silent,Silent,Missense_R370W,Silent,Silent,Missense_R370W,Silent	INTRON,EXON
rs1052551	17	44068924	A	G	0.1723	NM_001123067,NM_001203251,NM_005910,NM_016835,NM_001203252,NM_016834,NM_001123066,NM_016841	MAPT,MAPT,MAPT,MAPT,MAPT,MAPT,MAPT,MAPT	Synonymous_P147P,Synonymous_P147P,Synonymous_P176P,Synonymous_P493P,Synonymous_P176P,Synonymous_P118P,Synonymous_P493P,Synonymous_P118P	EXON
rs17652121	17	44073973	G	A	0.1723	NM_001123067,NM_001203251,NM_005910,NM_016835,NM_001203252,NM_016834,NM_001123066,NM_016841	MAPT,MAPT,MAPT,MAPT,MAPT,MAPT,MAPT,MAPT	Synonymous_N226N,Synonymous_N226N,Synonymous_N255N,Synonymous_N572N,Synonymous_N255N,Synonymous_N197N,Synonymous_N590N,Synonymous_N197N	EXON
rs1052587	17	44102604	G	A	0.1723	NM_001123067,NM_001203251,NM_005910,NM_016835,NM_001203252,NM_016834,NM_001123066,NM_016841	MAPT,MAPT,MAPT,MAPT,MAPT,MAPT,MAPT,MAPT	Silent,Silent,Silent,Silent,Silent,Silent,Silent,Silent	UTR
rs7350928	17	44108100	A	G	0.1723	NM_001193465,NM_001193466,NM_015443	KANSL1,KANSL1,KANSL1	Silent,Silent,Silent	UTR
rs17574361	17	44108202	G	A	0.1723	NM_001193465,NM_001193466,NM_015443	KANSL1,KANSL1,KANSL1	Silent,Silent,Silent	UTR
rs17574604	17	44111613	G	A	0.1723	NM_001193465,NM_001193466,NM_015443	KANSL1,KANSL1,KANSL1	Synonymous_F859F,Synonymous_F860F,Synonymous_F860F	EXON
rs17660464	17	44177993	A	C	0.1723	NM_001193465,NM_001193466,NM_015443	KANSL1,KANSL1,KANSL1	Silent,Silent,Silent	INTRON
rs17577094	17	44187492	G	A	0.1723	NM_001193465,NM_001193466,NM_015443	KANSL1,KANSL1,KANSL1	Silent,Silent,Silent	INTRON
rs1052553	17	44073889	G	A	0.1737	NM_001123067,NM_001203251,NM_005910,NM_016835,NM_001203252,NM_016834,NM_001123066,NM_016841	MAPT,MAPT,MAPT,MAPT,MAPT,MAPT,MAPT,MAPT	Synonymous_A198A,Synonymous_A198A,Synonymous_A227A,Synonymous_A544A,Synonymous_A227A,Synonymous_A169A,Synonymous_A562A,Synonymous_A169A	EXON
rs2532329	17	44350090	A	G	0.1695
rs17660132	17	44165803	G	A	0.1653	NM_001193465,NM_001193466,NM_015443	KANSL1,KANSL1,KANSL1	Silent,Silent,Silent	INTRON
rs2532274	17	44247164	G	A	0.1752	NM_001193465,NM_001193466,NM_015443	KANSL1,KANSL1,KANSL1	Silent,Silent,Silent	INTRON
rs12373168	17	43924337	C	A	0.1765	NR_024559,NM_175882	MAPT-AS1,SPPL2C	Silent,Silent	INTRON,EXON
rs415430	17	44859144	G	A	0.1723	NM_030753	WNT3	Silent	INTRON
rs199454	17	44800110	G	A	0.1891	NR_040116,NM_006178	NSF,NSF	Silent,Silent	INTRON
rs7224296	17	44800046	G	A	0.2059	NR_040116,NM_006178	NSF,NSF	Silent,Silent	INTRON
rs17690703	17	43925297	A	G	0.1933	NR_024559	MAPT-AS1	Silent	INTRON,EXON
rs2732674	17	44280697	G	A	0.1555	NM_001193465	KANSL1	Silent	INTRON
rs199501	17	44862613	A	G	0.1891	NM_030753	WNT3	Silent	INTRON
rs1635291	17	43751913	G	A	0.1891	NM_001256299,NR_037772	CRHR1,CRHR1	Silent,Silent	INTRON
rs1724400	17	43755871	A	C	0.1891	NM_001256299,NR_037772	CRHR1,CRHR1	Silent,Silent	INTRON
rs7215239	17	43767773	G	A	0.1891	NM_001256299,NR_037772	CRHR1,CRHR1	Silent,Silent	INTRON
rs417968	17	43728376	G	A	0.1992	NM_001256299,NR_037772	CRHR1,CRHR1	Silent,Silent	INTRON
rs2732651	17	44345063	A	G	0.1478
rs113413	22	24292264	G	A	0.3824
rs2074404	17	44865439	C	A	0.2143	NM_030753	WNT3	Silent	INTRON
rs375984	6	29644502	A	G	0.2311	NM_001109809	ZFP57	Silent	INTRON
rs2535238	6	29645038	A	C	0.2311
rs2747429	6	29648377	G	A	0.2311
rs387642	6	29645634	A	G	0.235
rs2747421	6	29645118	G	C	0.2331
rs3117289	6	29609921	G	A	0.2017
rs3129073	6	29615822	G	A	0.2017
rs2463524	17	44326245	G	A	0.1447
rs3117301	6	29654700	A	G	0.2395
rs2747457	6	29656417	C	A	0.2395
rs2747460	6	29657127	A	G	0.2395
rs2957297	17	44368212	A	C	0.1435
rs2739338	22	24297130	A	G	0.3941
rs3129039	6	29658864	A	G	0.2185
rs6928482	6	32626249	G	A	0.4202
rs1002286	22	24257337	G	A	0.4412
rs4822453	22	24254862	C	A	0.416
rs29218	6	29607429	G	A	0.2185
rs2000468	22	24241611	C	A	0.4454
rs29228	6	29623739	A	G	0.1897
rs1007888	22	24241101	G	A	0.4449	NR_038911	LOC284889	Silent	EXON
rs3129066	6	29668537	G	A	0.2437
rs3129055	6	29670261	G	A	0.2437
rs9258122	6	29671740	A	G	0.2437
rs1632962	6	29683808	A	G	0.2227
rs2107203	6	29669830	A	G	0.2479
rs396660	6	29646165	A	G	0.2899
rs445150	6	29646879	G	A	0.2899
rs2747430	6	29648506	A	G	0.2899
rs1610601	6	29700183	A	C	0.2269	NR_026973,NR_026972	HLA-F-AS1,HLA-F-AS1	Silent,Silent	INTRON,EXON
rs1610621	6	29718790	A	G	0.2269	NR_001590	IFITM4P	Silent	EXON
rs8026605	15	40875584	G	A	0.395
rs7494968	15	40811858	A	G	0.4034
rs6582	15	40845597	A	G	0.3992	NM_001080791,NM_052849,NM_001080792	C15orf57,C15orf57,C15orf57	Silent,Silent,Silent	UTR
rs17631676	17	43549526	G	A	0.1261	NR_027774,NR_027782,NM_014798	PLEKHM1,PLEKHM1,PLEKHM1	Silent,Silent,Silent	INTRON,EXON
rs16970851	15	40885107	G	A	0.3992
rs3751653	15	40886621	G	A	0.3992	NM_144508,NM_170589	CASC5,CASC5	Silent,Silent	INTRON
rs11858113	15	40914177	G	A	0.3992	NM_144508,NM_170589	CASC5,CASC5	Missense_M572T,Missense_M598T	EXON
rs11855334	15	40914772	A	G	0.3992	NM_144508,NM_170589	CASC5,CASC5	Synonymous_V770V,Synonymous_V796V	EXON
rs2412544	15	40949526	A	G	0.3992	NM_144508,NM_170589	CASC5,CASC5	Silent,Silent	INTRON
rs35047458	15	40959624	A	G	0.3992
rs8041534	15	40915045	C	A	0.3983	NM_144508,NM_170589	CASC5,CASC5	Synonymous_T861T,Synonymous_T887T	EXON
rs6003959	22	24264395	A	G	0.2479
rs885945	6	29696852	A	G	0.2479	NR_026973,NR_026972	HLA-F-AS1,HLA-F-AS1	Silent,Silent	INTRON,EXON

## Sheet: c) Annotation mRNA probes
Affymetrix Probeset_ID	Affymetrix Transcript Cluster_ID	seqname	strand	start	stop	total_probes	gene_symbol	gene_assignment	mrna_assignment	swissprot	unigene	GO_biological_process	GO_cellular_component	GO_molecular_function	pathway	protein_domains	crosshyb_type	category
8007848	8007848	chr17	+	44321463	44322413	24	LOC644172	NM_005456 // MAPK8IP1 // mitogen-activated protein kinase 8 interacting protein 1 // 11p11.2 // 9479 /// ENST00000241014 // MAPK8IP1 // mitogen-activated protein kinase 8 interacting protein 1 // 11p11.2 // 9479 /// BC068470 // MAPK8IP1 // mitogen-activated protein kinase 8 interacting protein 1 // 11p11.2 // 9479 /// NR_026901 // LOC644172 // mitogen-activated protein kinase 8 interacting protei…	NM_005456 // RefSeq // Homo sapiens mitogen-activated protein kinase 8 interacting protein 1 (MAPK8IP1), mRNA. // chr17 // 67 // 100 // 16 // 24 // 0 /// ENST00000241014 // ENSEMBL // C-Jun-amino-terminal kinase-interacting protein 1 gene:ENSG00000121653 // chr17 // 67 // 100 // 16 // 24 // 0 /// BC068470 // GenBank // Homo sapiens mitogen-activated protein kinase 8 interacting protein 1, mRNA (c…	NM_005456 // Q59EU1 /// NM_005456 // Q9UQF2 /// BC068470 // Q6NUQ9 /// BC068470 // Q59EU1 /// BC068470 // Q9UQF2	NM_005456 // Hs.234249 // adrenal gland| brain| embryonic tissue| eye| heart| kidney| liver| lung| mouth| muscle| nerve| ovary| pancreas| pituitary gland| placenta| prostate| skin| stomach| testis| vascular|adrenal tumor| gastrointestinal tumor| germ cell tumor| glioma| head and neck tumor| kidney tumor| liver tumor| lung tumor| normal| ovarian tumor| pancreatic tumor| prostate cancer| retinoblas…	NM_005456 // GO:0006355 // regulation of transcription, DNA-dependent // inferred from electronic annotation /// NM_005456 // GO:0006916 // anti-apoptosis // inferred from electronic annotation /// NM_005456 // GO:0007165 // signal transduction // inferred from electronic annotation /// NM_005456 // GO:0007258 // JUN phosphorylation // inferred from electronic annotation /// NM_005456 // GO:00161…	NM_005456 // GO:0005634 // nucleus // inferred from electronic annotation /// NM_005456 // GO:0005737 // cytoplasm // inferred from direct assay /// NM_005456 // GO:0005829 // cytosol // inferred from electronic annotation /// NM_005456 // GO:0016020 // membrane // inferred from electronic annotation /// NM_005456 // GO:0043005 // neuron projection // inferred from electronic annotation /// NM_00…	NM_005456 // GO:0004860 // protein kinase inhibitor activity // traceable author statement /// NM_005456 // GO:0005078 // MAP-kinase scaffold activity // inferred from physical interaction /// NM_005456 // GO:0005515 // protein binding // inferred from physical interaction /// NM_005456 // GO:0008432 // JUN kinase binding // inferred from electronic annotation /// NM_005456 // GO:0019894 // kines…	---	ENST00000241014 // Pfam // IPR011511 // Variant SH3	3	main
8016261	8016261	chr17	-	43678235	43679197	24	LOC644172	NM_005456 // MAPK8IP1 // mitogen-activated protein kinase 8 interacting protein 1 // 11p11.2 // 9479 /// ENST00000241014 // MAPK8IP1 // mitogen-activated protein kinase 8 interacting protein 1 // 11p11.2 // 9479 /// BC068470 // MAPK8IP1 // mitogen-activated protein kinase 8 interacting protein 1 // 11p11.2 // 9479 /// NR_026901 // LOC644172 // mitogen-activated protein kinase 8 interacting protei…	NM_005456 // RefSeq // Homo sapiens mitogen-activated protein kinase 8 interacting protein 1 (MAPK8IP1), mRNA. // chr17 // 67 // 100 // 16 // 24 // 0 /// ENST00000241014 // ENSEMBL // C-Jun-amino-terminal kinase-interacting protein 1 gene:ENSG00000121653 // chr17 // 67 // 100 // 16 // 24 // 0 /// BC068470 // GenBank // Homo sapiens mitogen-activated protein kinase 8 interacting protein 1, mRNA (c…	NM_005456 // Q59EU1 /// NM_005456 // Q9UQF2 /// BC068470 // Q6NUQ9 /// BC068470 // Q59EU1 /// BC068470 // Q9UQF2	NM_005456 // Hs.234249 // adrenal gland| brain| embryonic tissue| eye| heart| kidney| liver| lung| mouth| muscle| nerve| ovary| pancreas| pituitary gland| placenta| prostate| skin| stomach| testis| vascular|adrenal tumor| gastrointestinal tumor| germ cell tumor| glioma| head and neck tumor| kidney tumor| liver tumor| lung tumor| normal| ovarian tumor| pancreatic tumor| prostate cancer| retinoblas…	NM_005456 // GO:0006355 // regulation of transcription, DNA-dependent // inferred from electronic annotation /// NM_005456 // GO:0006916 // anti-apoptosis // inferred from electronic annotation /// NM_005456 // GO:0007165 // signal transduction // inferred from electronic annotation /// NM_005456 // GO:0007258 // JUN phosphorylation // inferred from electronic annotation /// NM_005456 // GO:00161…	NM_005456 // GO:0005634 // nucleus // inferred from electronic annotation /// NM_005456 // GO:0005737 // cytoplasm // inferred from direct assay /// NM_005456 // GO:0005829 // cytosol // inferred from electronic annotation /// NM_005456 // GO:0016020 // membrane // inferred from electronic annotation /// NM_005456 // GO:0043005 // neuron projection // inferred from electronic annotation /// NM_00…	NM_005456 // GO:0004860 // protein kinase inhibitor activity // traceable author statement /// NM_005456 // GO:0005078 // MAP-kinase scaffold activity // inferred from physical interaction /// NM_005456 // GO:0005515 // protein binding // inferred from physical interaction /// NM_005456 // GO:0008432 // JUN kinase binding // inferred from electronic annotation /// NM_005456 // GO:0019894 // kines…	---	ENST00000241014 // Pfam // IPR011511 // Variant SH3	3	main
8016259	8016259	chr17	-	43625089	43627701	20	LRRC37A2	NM_001006607 // LRRC37A2 // leucine rich repeat containing 37, member A2 // 17q21.31 // 474170 /// NM_014834 // LRRC37A // leucine rich repeat containing 37A // 17q21.31 // 9884 /// NM_199340 // LRRC37A3 // leucine rich repeat containing 37, member A3 // 17q24.1 // 374819 /// ENST00000393466 // LRRC37A // leucine rich repeat containing 37A // 17q21.31 // 9884 /// ENST00000320254 // LRRC37A // leu…	NM_001006607 // RefSeq // Homo sapiens leucine rich repeat containing 37, member A2 (LRRC37A2), mRNA. // chr17 // 100 // 100 // 20 // 20 // 0 /// NM_014834 // RefSeq // Homo sapiens leucine rich repeat containing 37A (LRRC37A), mRNA. // chr17 // 100 // 100 // 20 // 20 // 0 /// NM_199340 // RefSeq // Homo sapiens leucine rich repeat containing 37, member A3 (LRRC37A3), mRNA. // chr17 // 95 // 100 …	NM_001006607 // B7ZMC3 /// NM_001006607 // A6NMS7 /// NM_014834 // B7ZMC3 /// NM_014834 // A6NMS7 /// NM_199340 // O60309 /// BC040501 // A6NMS7 /// BC040501 // B7ZMC3	NM_001006607 // Hs.646568 // adipose tissue| bone| brain| connective tissue| ear| embryonic tissue| heart| intestine| kidney| liver| lung| lymph node| mammary gland| mouth| muscle| nerve| ovary| pharynx| pituitary gland| prostate| testis| thymus| thyroid| trachea| uterus| breast (mammary gland) tumor| chondrosarcoma| germ cell tumor| glioma| head and neck tumor| liver tumor| lung tumor| normal| o…	---	NM_001006607 // GO:0016020 // membrane // inferred from electronic annotation /// NM_001006607 // GO:0016021 // integral to membrane // inferred from electronic annotation /// NM_014834 // GO:0016020 // membrane // inferred from electronic annotation /// NM_014834 // GO:0016021 // integral to membrane // inferred from electronic annotation /// NM_199340 // GO:0016020 // membrane // inferred from …	NM_001006607 // GO:0005515 // protein binding // inferred from electronic annotation /// NM_014834 // GO:0005515 // protein binding // inferred from electronic annotation /// NM_199340 // GO:0005515 // protein binding // inferred from electronic annotation /// ENST00000393466 // GO:0005515 // protein binding // inferred from electronic annotation /// ENST00000320254 // GO:0005515 // protein bindi…	---	---	3	main
8007799	8007799	chr17	+	43697856	43715325	18	MGC57346	NR_026680 // MGC57346 // hypothetical LOC401884 // 17q21.31 // 401884 /// NR_027295 // MGC57346 // hypothetical LOC401884 // 17q21.31 // 401884 /// FJ543100 // CRHR1 // corticotropin releasing hormone receptor 1 // 17q12-q22 // 1394 /// AK055316 // MGC57346 // hypothetical LOC401884 // 17q21.31 // 401884	NR_026680 // RefSeq // Homo sapiens hypothetical LOC401884 (MGC57346), transcript variant 1, non-coding RNA. // chr17 // 100 // 94 // 18 // 17 // 0 /// NR_027295 // RefSeq // Homo sapiens hypothetical LOC401884 (MGC57346), transcript variant 2, non-coding RNA. // chr17 // 100 // 94 // 18 // 17 // 0 /// FJ543100 // GenBank // Homo sapiens corticotropin releasing hormone receptor 1 splice variant (…	FJ543100 // B4DIE9 /// FJ543100 // Q8WXR5 /// FJ543100 // Q8WXR6 /// FJ543100 // Q8WXR7 /// FJ543100 // P34998	NR_026680 // Hs.654930 // adrenal gland| brain| cervix| embryonic tissue| esophagus| eye| heart| intestine| kidney| liver| lung| lymph| lymph node| muscle| ovary| placenta| prostate| spleen| stomach| testis| thymus| trachea| uterus| cervical tumor| colorectal tumor| esophageal tumor| gastrointestinal tumor| germ cell tumor| glioma| kidney tumor| liver tumor| lung tumor| lymphoma| non-neoplasia| n…	FJ543100 // GO:0006955 // immune response // traceable author statement /// FJ543100 // GO:0007186 // G-protein coupled receptor protein signaling pathway // traceable author statement /// FJ543100 // GO:0007188 // G-protein signaling, coupled to cAMP nucleotide second messenger // traceable author statement /// FJ543100 // GO:0007190 // activation of adenylate cyclase activity // traceable autho…	FJ543100 // GO:0005886 // plasma membrane // not recorded /// FJ543100 // GO:0005887 // integral to plasma membrane // traceable author statement	FJ543100 // GO:0015056 // corticotrophin-releasing factor receptor activity // traceable author statement	FJ543100 // GenMAPP // GPCRDB_Class_B_Secretin-like /// FJ543100 // GenMAPP // Smooth_muscle_contraction	---	1	main
8074980	8074980	chr22	-	24376141	24384276	25	GSTT1	NM_000853 // GSTT1 // glutathione S-transferase theta 1 // 22q11.23 // 2952 /// ENST00000248935 // GSTT1 // glutathione S-transferase theta 1 // 22q11.23 // 2952 /// BC007065 // GSTT1 // glutathione S-transferase theta 1 // 22q11.23 // 2952 /// BT019951 // GSTT1 // glutathione S-transferase theta 1 // 22q11.23 // 2952 /// AF435971 // GSTT1 // glutathione S-transferase theta 1 // 22q11.23 // 2952 …	NM_000853 // RefSeq // Homo sapiens glutathione S-transferase theta 1 (GSTT1), mRNA. // chr22 // 100 // 100 // 25 // 25 // 0 /// ENST00000248935 // ENSEMBL // Glutathione S-transferase theta-1 gene:ENSG00000184674 // chr22 // 100 // 100 // 25 // 25 // 0 /// BC007065 // GenBank // Homo sapiens glutathione S-transferase theta 1, mRNA (cDNA clone MGC:12516 IMAGE:3995846), complete cds. // chr22 // 8…	NM_000853 // Q4GZS9 /// NM_000853 // Q4W251 /// NM_000853 // Q4W252 /// NM_000853 // P30711 /// BC007065 // P30711 /// BC007065 // Q4GZS9 /// BC007065 // Q4W251 /// BC007065 // Q4W252 /// BT019951 // P30711 /// BT019951 // Q4GZS9 /// BT019951 // Q4W251 /// BT019951 // Q4W252 /// AF435971 // P30711 /// AF435971 // Q4GZS9 /// AF435971 // Q4W251 /// AF435971 // Q4W252 /// CR456499 // Q6IC69 /// CR45…	NM_000853 // Hs.268573 // adipose tissue| bladder| blood| bone| brain| cervix| connective tissue| embryonic tissue| eye| heart| intestine| kidney| liver| lung| lymph node| mammary gland| mouth| muscle| ovary| pancreas| parathyroid| pharynx| placenta| prostate| skin| stomach| testis| thymus| thyroid| tonsil| uterus| vascular| bladder carcinoma| breast (mammary gland) tumor| cervical tumor| chondro…	NM_000853 // GO:0006749 // glutathione metabolic process // inferred from direct assay /// ENST00000248935 // GO:0006749 // glutathione metabolic process // inferred from direct assay /// BC007065 // GO:0006749 // glutathione metabolic process // inferred from direct assay /// BT019951 // GO:0006749 // glutathione metabolic process // inferred from direct assay /// AF435971 // GO:0006749 // gluta…	NM_000853 // GO:0005625 // soluble fraction // inferred from direct assay /// NM_000853 // GO:0005737 // cytoplasm // inferred from electronic annotation /// NM_000853 // GO:0005829 // cytosol // inferred from direct assay /// ENST00000248935 // GO:0005625 // soluble fraction // inferred from direct assay /// ENST00000248935 // GO:0005737 // cytoplasm // inferred from electronic annotation /// EN…	NM_000853 // GO:0004364 // glutathione transferase activity // inferred from direct assay /// NM_000853 // GO:0004602 // glutathione peroxidase activity // inferred from direct assay /// NM_000853 // GO:0016740 // transferase activity // inferred from electronic annotation /// ENST00000248935 // GO:0004364 // glutathione transferase activity // inferred from direct assay /// ENST00000248935 // GO…	---	---	1	main
8124684	8124684	chr6	-	29640260	29658489	25	ZFP57	NM_001109809 // ZFP57 // zinc finger protein 57 homolog (mouse) // 6p22.1 // 346171 /// ENST00000488757 // ZFP57 // zinc finger protein 57 homolog (mouse) // 6p22.1 // 346171 /// ENST00000458475 // ZFP57 // zinc finger protein 57 homolog (mouse) // 6p22.1 // 346171 /// BC171888 // ZFP57 // zinc finger protein 57 homolog (mouse) // 6p22.1 // 346171 /// BC157878 // ZFP57 // zinc finger protein 57 h…	NM_001109809 // RefSeq // Homo sapiens zinc finger protein 57 homolog (mouse) (ZFP57), mRNA. // chr6 // 100 // 96 // 24 // 24 // 0 /// ENST00000488757 // ENSEMBL // Isoform 3 of Zinc finger protein 57 homolog gene:ENSG00000204644 // chr6 // 100 // 96 // 24 // 24 // 0 /// ENST00000458475 // ENSEMBL // Isoform 3 of Zinc finger protein 57 homolog gene:ENSG00000223852 // chr6 // 100 // 96 // 24 // 24…	BC171888 // B7ZW61 /// BC157878 // Q9NU63	NM_001109809 // Hs.156326 // brain| lung| mammary gland| placenta| uterus| bladder carcinoma| germ cell tumor| normal| uterine tumor| adult /// ENST00000488757 // Hs.156326 // brain| lung| mammary gland| placenta| uterus| bladder carcinoma| germ cell tumor| normal| uterine tumor| adult /// ENST00000458475 // Hs.156326 // brain| lung| mammary gland| placenta| uterus| bladder carcinoma| germ cell t…	NM_001109809 // GO:0006349 // regulation of gene expression by genetic imprinting // inferred from mutant phenotype /// NM_001109809 // GO:0006355 // regulation of transcription, DNA-dependent // inferred from electronic annotation /// NM_001109809 // GO:0007275 // multicellular organismal development // inferred from electronic annotation /// NM_001109809 // GO:0043045 // DNA methylation involve…	NM_001109809 // GO:0005622 // intracellular // inferred from electronic annotation /// NM_001109809 // GO:0005634 // nucleus // inferred from electronic annotation /// ENST00000488757 // GO:0005622 // intracellular // inferred from electronic annotation /// ENST00000488757 // GO:0005634 // nucleus // inferred from electronic annotation /// ENST00000458475 // GO:0005622 // intracellular // inferre…	NM_001109809 // GO:0003677 // DNA binding // inferred from electronic annotation /// NM_001109809 // GO:0008270 // zinc ion binding // inferred from electronic annotation /// NM_001109809 // GO:0046872 // metal ion binding // inferred from electronic annotation /// ENST00000488757 // GO:0003677 // DNA binding // inferred from electronic annotation /// ENST00000488757 // GO:0008270 // zinc ion bin…	---	---	3	main
8118556	8118556	chr6	+	32605134	32611429	18	HLA-DQA1	NM_002122 // HLA-DQA1 // major histocompatibility complex, class II, DQ alpha 1 // 6p21.3 // 3117 /// ENST00000343139 // HLA-DQA1 // major histocompatibility complex, class II, DQ alpha 1 // 6p21.3 // 3117 /// ENST00000395364 // HLA-DQA1 // major histocompatibility complex, class II, DQ alpha 1 // 6p21.3 // 3117 /// ENST00000395363 // HLA-DQA1 // major histocompatibility complex, class II, DQ alp…	NM_002122 // RefSeq // Homo sapiens major histocompatibility complex, class II, DQ alpha 1 (HLA-DQA1), mRNA. // chr6 // 100 // 100 // 18 // 18 // 0 /// ENST00000343139 // ENSEMBL // major histocompatibility complex, class II, DQ alpha 1 precursor gene:ENSG00000196735 // chr6 // 100 // 100 // 18 // 18 // 0 /// ENST00000395364 // ENSEMBL // major histocompatibility complex, class II, DQ alpha 1 pre…	NM_002122 // P01909 /// NM_002122 // Q30062 /// NM_002122 // Q29782 /// NM_002122 // Q30066 /// NM_002122 // Q30065 /// NM_002122 // Q8MH01 /// NM_002122 // Q8MH02 /// NM_002122 // Q8MH03 /// NM_002122 // Q8MH10 /// NM_002122 // Q8MH11 /// NM_002122 // Q8MH26 /// NM_002122 // Q8MH27 /// NM_002122 // Q8MH28 /// NM_002122 // Q8MH32 /// NM_002122 // Q8MH33 /// NM_002122 // Q8MH34 /// NM_002122 // Q8…	NM_002122 // Hs.387679 // adipose tissue| adrenal gland| blood| bone| bone marrow| brain| cervix| connective tissue| eye| heart| intestine| kidney| liver| lung| lymph| lymph node| mammary gland| mouth| muscle| ovary| pancreas| parathyroid| pharynx| pituitary gland| placenta| prostate| skin| spleen| stomach| testis| thymus| thyroid| tonsil| trachea| uterus| vascular|adrenal tumor| bladder carcinom…	NM_002122 // GO:0002504 // antigen processing and presentation of peptide or polysaccharide antigen via MHC class II // inferred from electronic annotation /// NM_002122 // GO:0006955 // immune response // non-traceable author statement /// ENST00000343139 // GO:0002504 // antigen processing and presentation of peptide or polysaccharide antigen via MHC class II // inferred from electronic annotat…	NM_002122 // GO:0005765 // lysosomal membrane // inferred from electronic annotation /// NM_002122 // GO:0005768 // endosome // inferred from electronic annotation /// NM_002122 // GO:0005783 // endoplasmic reticulum // inferred from electronic annotation /// NM_002122 // GO:0005789 // endoplasmic reticulum membrane // inferred from electronic annotation /// NM_002122 // GO:0005794 // Golgi appar…	NM_002122 // GO:0032395 // MHC class II receptor activity // non-traceable author statement /// NM_002122 // GO:0032395 // MHC class II receptor activity // traceable author statement /// ENST00000343139 // GO:0032395 // MHC class II receptor activity // non-traceable author statement /// ENST00000343139 // GO:0032395 // MHC class II receptor activity // traceable author statement /// ENST0000039…	---	---	1	main
8007803	8007803	chr17	+	43717648	43719667	24	C17orf69	NR_026905 // C17orf69 // chromosome 17 open reading frame 69 // 17q21.31 // 147081 /// NR_026906 // C17orf69 // chromosome 17 open reading frame 69 // 17q21.31 // 147081 /// AK057897 // C17orf69 // chromosome 17 open reading frame 69 // 17q21.31 // 147081 /// ENST00000300525 // C17orf69 // chromosome 17 open reading frame 69 // 17q21.31 // 147081	NR_026905 // RefSeq // Homo sapiens chromosome 17 open reading frame 69 (C17orf69), transcript variant 1, non-coding RNA. // chr17 // 100 // 83 // 20 // 20 // 0 /// NR_026906 // RefSeq // Homo sapiens chromosome 17 open reading frame 69 (C17orf69), transcript variant 2, non-coding RNA. // chr17 // 100 // 17 // 4 // 4 // 0 /// AK057897 // GenBank // Homo sapiens cDNA FLJ25168 fis, clone CBR08585. …	AK057897 // Q96LR1	NR_026905 // Hs.128813 // brain| cervix| connective tissue| embryonic tissue| eye| heart| kidney| larynx| lung| lymph node| mammary gland| muscle| parathyroid| prostate| testis| trachea| uterus| breast (mammary gland) tumor| germ cell tumor| glioma| head and neck tumor| lymphoma| normal| primitive neuroectodermal tumor of the CNS| prostate cancer| soft tissue/muscle tissue tumor| uterine tumor|em…	---	NR_026905 // GO:0005576 // extracellular region // inferred from electronic annotation /// NR_026906 // GO:0005576 // extracellular region // inferred from electronic annotation /// AK057897 // GO:0005576 // extracellular region // inferred from electronic annotation /// ENST00000300525 // GO:0005576 // extracellular region // inferred from electronic annotation	---	---	---	1	main
7987526	7987526	chr15	-	40823540	40857252	28	C15orf57	NM_001080791 // C15orf57 // chromosome 15 open reading frame 57 // 15q15.1 // 90416 /// NM_052849 // C15orf57 // chromosome 15 open reading frame 57 // 15q15.1 // 90416 /// NM_001080792 // C15orf57 // chromosome 15 open reading frame 57 // 15q15.1 // 90416 /// NR_002208 // MRPL42P5 // mitochondrial ribosomal protein L42 pseudogene 5 // 15q13.3 // 359821 /// ENST00000416810 // C15orf57 // chromoso…	NM_001080791 // RefSeq // Homo sapiens chromosome 15 open reading frame 57 (C15orf57), transcript variant 3, mRNA. // chr15 // 100 // 79 // 22 // 22 // 0 /// NM_052849 // RefSeq // Homo sapiens chromosome 15 open reading frame 57 (C15orf57), transcript variant 2, mRNA. // chr15 // 100 // 75 // 21 // 21 // 0 /// NM_001080792 // RefSeq // Homo sapiens chromosome 15 open reading frame 57 (C15orf57),…	NM_001080791 // Q9BV29 /// NM_052849 // Q9BV29 /// NM_001080792 // Q9BV29 /// AL832032 // Q9BV29	NM_001080791 // Hs.654661 // ascites| blood| bone| bone marrow| brain| cervix| connective tissue| embryonic tissue| eye| heart| intestine| kidney| liver| lung| lymph| lymph node| mammary gland| muscle| ovary| pancreas| pharynx| placenta| prostate| salivary gland| stomach| testis| thymus| uterus| vascular| breast (mammary gland) tumor| cervical tumor| chondrosarcoma| colorectal tumor| gastrointest…	---	---	---	---	---	1	main
8125447	8125447	chr6	-	32546546	32634594	37	HLA-DQB1	NM_002123 // HLA-DQB1 // major histocompatibility complex, class II, DQ beta 1 // 6p21.3 // 3119 /// NM_002124 // HLA-DRB1 // major histocompatibility complex, class II, DR beta 1 // 6p21.3 // 3123 /// ENST00000399084 // HLA-DQB1 // major histocompatibility complex, class II, DQ beta 1 // 6p21.3 // 3119 /// ENST00000434651 // HLA-DQB1 // major histocompatibility complex, class II, DQ beta 1 // 6p…	NM_002123 // RefSeq // Homo sapiens major histocompatibility complex, class II, DQ beta 1 (HLA-DQB1), mRNA. // chr6 // 100 // 51 // 19 // 19 // 0 /// NM_002124 // RefSeq // Homo sapiens major histocompatibility complex, class II, DR beta 1 (HLA-DRB1), mRNA. // chr6 // 100 // 35 // 13 // 13 // 0 /// ENST00000399084 // ENSEMBL // major histocompatibility complex, class II, DQ beta 1 precursor gene:…	NM_002123 // Q30202 /// NM_002123 // Q30088 /// NM_002123 // P01920 /// NM_002123 // Q9TQ76 /// NM_002124 // Q95379 /// NM_002124 // Q30008 /// NM_002124 // Q30179 /// NM_002124 // P01911 /// NM_002124 // Q29974 /// NM_002124 // Q29791 /// NM_002124 // Q4A1G9 /// NM_002124 // O19517 /// AK296613 // Q5Y7A9 /// AK296613 // P01920 /// AK296613 // O19764 /// AK296613 // Q29969 /// AK296613 // O19741 …	NM_002123 // Hs.409934 // adipose tissue| adrenal gland| bladder| blood| bone| bone marrow| brain| cervix| connective tissue| embryonic tissue| esophagus| eye| intestine| kidney| liver| lung| lymph| lymph node| mammary gland| mouth| muscle| nerve| ovary| pancreas| pharynx| pituitary gland| placenta| prostate| skin| spleen| stomach| testis| thymus| thyroid| tonsil| trachea| uterus| vascular|adrena…	NM_002123 // GO:0002504 // antigen processing and presentation of peptide or polysaccharide antigen via MHC class II // inferred from electronic annotation /// NM_002123 // GO:0006955 // immune response // non-traceable author statement /// NM_002123 // GO:0019886 // antigen processing and presentation of exogenous peptide antigen via MHC class II // inferred from electronic annotation /// NM_002…	NM_002123 // GO:0005622 // intracellular // inferred from electronic annotation /// NM_002123 // GO:0005765 // lysosomal membrane // inferred from electronic annotation /// NM_002123 // GO:0005769 // early endosome // inferred from electronic annotation /// NM_002123 // GO:0005771 // multivesicular body // inferred from electronic annotation /// NM_002123 // GO:0005783 // endoplasmic reticulum //…	NM_002123 // GO:0005515 // protein binding // inferred from electronic annotation /// NM_002123 // GO:0032395 // MHC class II receptor activity // non-traceable author statement /// NM_002123 // GO:0042605 // peptide antigen binding // inferred from electronic annotation /// NM_002124 // GO:0032395 // MHC class II receptor activity // non-traceable author statement /// NM_002124 // GO:0032395 // …	---	---	1	main
8017688	8017688	chr17	-	62850488	62894580	88	LRRC37A3	NM_199340 // LRRC37A3 // leucine rich repeat containing 37, member A3 // 17q24.1 // 374819 /// NM_001006607 // LRRC37A2 // leucine rich repeat containing 37, member A2 // 17q21.31 // 474170 /// ENST00000319651 // LRRC37A3 // leucine rich repeat containing 37, member A3 // 17q24.1 // 374819 /// ENST00000333412 // LRRC37A2 // leucine rich repeat containing 37, member A2 // 17q21.31 // 474170 /// EN…	NM_199340 // RefSeq // Homo sapiens leucine rich repeat containing 37, member A3 (LRRC37A3), mRNA. // chr17 // 99 // 100 // 87 // 88 // 0 /// NM_001006607 // RefSeq // Homo sapiens leucine rich repeat containing 37, member A2 (LRRC37A2), mRNA. // chr17 // 89 // 94 // 74 // 83 // 0 /// ENST00000319651 // ENSEMBL // Leucine-rich repeat-containing protein 37A3 gene:ENSG00000176809 // chr17 // 100 //…	NM_199340 // O60309 /// NM_001006607 // B7ZMC3 /// NM_001006607 // A6NMS7 /// BC043145 // O60309	NM_199340 // Hs.551962 // adipose tissue| bone| brain| embryonic tissue| eye| heart| intestine| kidney| larynx| liver| mammary gland| mouth| pancreas| pharynx| pituitary gland| placenta| prostate| testis| thymus| uterus| breast (mammary gland) tumor| chondrosarcoma| colorectal tumor| glioma| head and neck tumor| normal| prostate cancer| uterine tumor|embryoid body| fetus| adult /// NM_001006607 /…	---	NM_199340 // GO:0016020 // membrane // inferred from electronic annotation /// NM_199340 // GO:0016021 // integral to membrane // inferred from electronic annotation /// NM_001006607 // GO:0016020 // membrane // inferred from electronic annotation /// NM_001006607 // GO:0016021 // integral to membrane // inferred from electronic annotation /// ENST00000319651 // GO:0016020 // membrane // inferred…	NM_199340 // GO:0005515 // protein binding // inferred from electronic annotation /// NM_001006607 // GO:0005515 // protein binding // inferred from electronic annotation /// ENST00000319651 // GO:0005515 // protein binding // inferred from electronic annotation /// ENST00000333412 // GO:0005515 // protein binding // inferred from electronic annotation /// ENST00000393466 // GO:0005515 // protein…	---	---	3	main
8007865	8007865	chr17	+	44397045	44397339	20		---	ENST00000489005 // ENSEMBL // ncrna_pseudogene:scRNA_pseudogene chromosome:GRCh37:17:62867623:62867898:-1 gene:ENSG00000239507 // chr17 // 55 // 100 // 11 // 20 // 0 /// ENST00000497725 // ENSEMBL // ncrna_pseudogene:scRNA_pseudogene chromosome:GRCh37:17:45119195:45119470:1 gene:ENSG00000239399 // chr17 // 40 // 100 // 8 // 20 // 0	---	---	---	---	---	---	---	3	main
8007883	8007883	chr17	+	44614900	44615194	20		---	ENST00000489005 // ENSEMBL // ncrna_pseudogene:scRNA_pseudogene chromosome:GRCh37:17:62867623:62867898:-1 gene:ENSG00000239507 // chr17 // 55 // 100 // 11 // 20 // 0 /// ENST00000497725 // ENSEMBL // ncrna_pseudogene:scRNA_pseudogene chromosome:GRCh37:17:45119195:45119470:1 gene:ENSG00000239399 // chr17 // 40 // 100 // 8 // 20 // 0	---	---	---	---	---	---	---	3	main
8007867	8007867	chr17	+	44590076	44633014	107	LRRC37A2	NM_001006607 // LRRC37A2 // leucine rich repeat containing 37, member A2 // 17q21.31 // 474170 /// NM_014834 // LRRC37A // leucine rich repeat containing 37A // 17q21.31 // 9884 /// NM_199340 // LRRC37A3 // leucine rich repeat containing 37, member A3 // 17q24.1 // 374819 /// ENST00000333412 // LRRC37A2 // leucine rich repeat containing 37, member A2 // 17q21.31 // 474170 /// ENST00000393466 // L…	NM_001006607 // RefSeq // Homo sapiens leucine rich repeat containing 37, member A2 (LRRC37A2), mRNA. // chr17 // 100 // 100 // 107 // 107 // 0 /// NM_014834 // RefSeq // Homo sapiens leucine rich repeat containing 37A (LRRC37A), mRNA. // chr17 // 98 // 98 // 103 // 105 // 0 /// NM_199340 // RefSeq // Homo sapiens leucine rich repeat containing 37, member A3 (LRRC37A3), mRNA. // chr17 // 68 // 74…	NM_001006607 // B7ZMC3 /// NM_001006607 // A6NMS7 /// NM_014834 // B7ZMC3 /// NM_014834 // A6NMS7 /// NM_199340 // O60309 /// BC040501 // A6NMS7 /// BC040501 // B7ZMC3 /// AY386262 // Q5YKG5 /// AY386262 // B7ZMC3 /// AY386262 // A6NMS7 /// BC043145 // O60309	NM_001006607 // Hs.646568 // adipose tissue| bone| brain| connective tissue| ear| embryonic tissue| heart| intestine| kidney| liver| lung| lymph node| mammary gland| mouth| muscle| nerve| ovary| pharynx| pituitary gland| prostate| testis| thymus| thyroid| trachea| uterus| breast (mammary gland) tumor| chondrosarcoma| germ cell tumor| glioma| head and neck tumor| liver tumor| lung tumor| normal| o…	---	NM_001006607 // GO:0016020 // membrane // inferred from electronic annotation /// NM_001006607 // GO:0016021 // integral to membrane // inferred from electronic annotation /// NM_014834 // GO:0016020 // membrane // inferred from electronic annotation /// NM_014834 // GO:0016021 // integral to membrane // inferred from electronic annotation /// NM_199340 // GO:0016020 // membrane // inferred from …	NM_001006607 // GO:0005515 // protein binding // inferred from electronic annotation /// NM_014834 // GO:0005515 // protein binding // inferred from electronic annotation /// NM_199340 // GO:0005515 // protein binding // inferred from electronic annotation /// ENST00000333412 // GO:0005515 // protein binding // inferred from electronic annotation /// ENST00000393466 // GO:0005515 // protein bindi…	---	---	3	main
